# Supplementary material for: Mesencephalic dopaminergic neurons express a repertoire of olfactory receptors and respond to odorant-like molecules
Source: PubMed Central journal article supplement (PMC4161876; doi:10.1186/1471-2164-15-729), 2014-08-27
Supplement: 12864_2013_6425_MOESM1_ESM.pdf [file 12864_2013_6425_MOESM1_ESM.pdf]

| receptor_ID | nanoCAGE libraries |               | PCR validation |             |
|-------------|--------------------|---------------|----------------|-------------|
|             | A9                 | A10           | MB             | LCM neurons |
| Olfr78      | 0.26               | -             | -              | NT          |
| Olfr118     | 1.8                | -             | -              | NT          |
| Olfr130     | 1.33               | -             | -              | NT          |
| Olfr234     | -                  | 0.13          | -              | NT          |
| Olfr287     | -                  | 3.49          | +              | +           |
| Olfr299     | -                  | 3.3           | +              | -           |
| Olfr316     | 4.29               | -             | +              | +           |
| Olfr420     | -                  | 4.41          | -              | NT          |
| Olfr449     | 1.31               | -             | -              | NT          |
| Olfr502     | -                  | 5.72          | -              | NT          |
| Olfr723     | 2.71               | 6.98          | -              | NT          |
| Olfr883     | -                  | 1.74          | +              | +           |
| Olfr885     | 0.15               | 1             | -              | NT          |
| Olfr909     | -                  | 4.19          | -              | NT          |
| Olfr958     | -                  | 3.88          | -              | NT          |
| Olfr1129    | -                  | 1.96          | -              | NT          |
| Olfr1288    | -                  | 1.3           | +              | -           |
| Olfr1344    | multiple tags      | multiple tags | +              | +           |
| Olfr1443    | -                  | 0.34          | -              | NT          |

**Supplementary Table S1. List of mDA-ORs.** Complete list of ORs identified by nanoCAGE in A9 and A10 neurons. Expression values (TPM) measured for each receptor is indicated in the appropriate column. No expression is also shown (-). Results from non-quantitative PCR validation in RNA extracted from total midbrain (MB) or from laser capture microdissected (LCM) neurons are indicated (-, negative; +, positive; NT, not tested).
