# Supplementary material for: Mesencephalic dopaminergic neurons express a repertoire of olfactory receptors and respond to odorant-like molecules
Source: PubMed Central journal article supplement (PMC4161876; doi:10.1186/1471-2164-15-729), 2014-08-27
Supplement: 12864_2013_6425_MOESM3_ESM.pdf [file 12864_2013_6425_MOESM3_ESM.pdf]

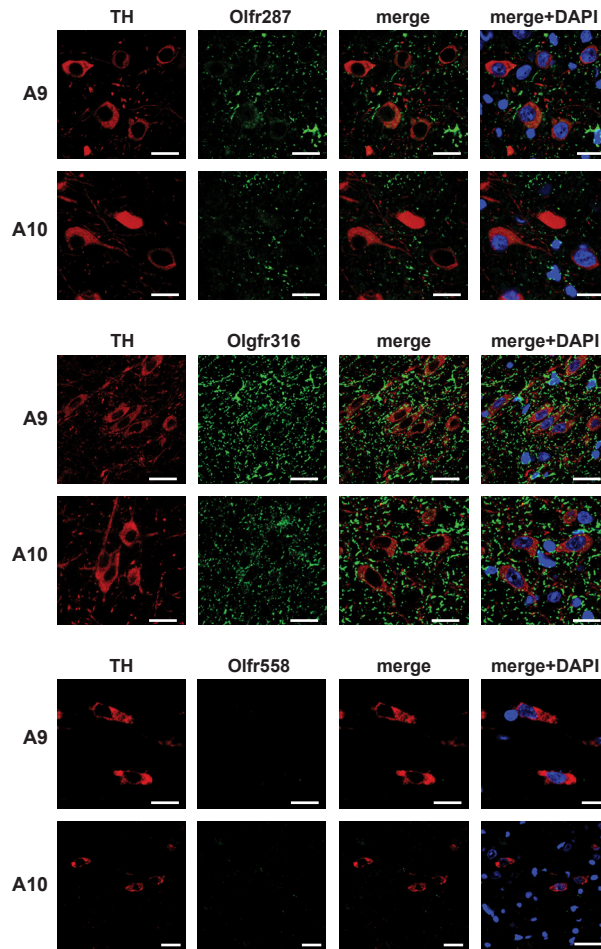

**Supplementary Figure S2. Specificity of expression of ORs in mDA neurons.** Specificity of expression of *Olf287*, *Olf316* and *Olf558* transcripts (green) by ISH in A9 and A10 DA neurons is verified with control sense probes. DA neurons in SN are visualized by anti-TH immuno-staining (red). Nuclei are shown in blue (DAPI). Scale bars indicate 20 μm. Data are representative of n=3 independent experiments.
