# Supplementary material for: Mesencephalic dopaminergic neurons express a repertoire of olfactory receptors and respond to odorant-like molecules
Source: PubMed Central journal article supplement (PMC4161876; doi:10.1186/1471-2164-15-729), 2014-08-27
Supplement: 12864_2013_6425_MOESM4_ESM.pdf [file 12864_2013_6425_MOESM4_ESM.pdf]

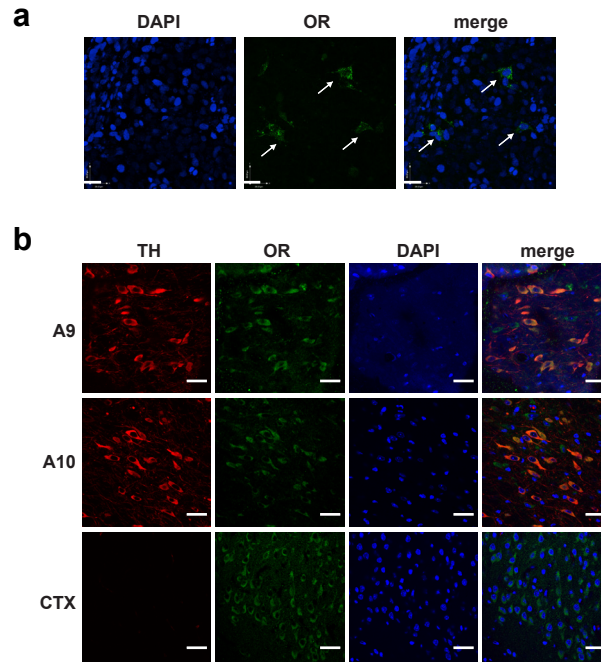

**Supplementary Figure S3. Endogenous OR protein is expressed in mDA neurons and in mouse brain.** **a)** Anti-OR51E1 antibody recognized *Olf558* (green) expressed in heterologous HEK 293 cells. Immunofluorescence in non-permeabilizing conditions. Nuclei are visualized with DAPI (blue). Scale bars indicate 38  $\mu$ m. White arrows highlight transfected cells. **b)** Endogenous OR protein is detected in A9 and A10 mDA neurons and in the cortex. mDA neurons were visualized with anti-TH (red) and OR with anti-OR51E1 specific antibody (green). Nuclei are stained with DAPI (blue). Scale bars indicate 20  $\mu$ m. Images are representative of n=3 independent experiments.
