# Supplementary material for: Mesencephalic dopaminergic neurons express a repertoire of olfactory receptors and respond to odorant-like molecules
Source: PubMed Central journal article supplement (PMC4161876; doi:10.1186/1471-2164-15-729), 2014-08-27
Supplement: 12864_2013_6425_MOESM6_ESM.pdf [file 12864_2013_6425_MOESM6_ESM.pdf]

| <b>Oious odor</b>     | <b>Stock concentration (M)</b> |
|-----------------------|--------------------------------|
| Hexanal               | 8.15M                          |
| Benzyl Alcohol        | 9.6M                           |
| Heptanoic acid        | 6.9M                           |
| Propionic acid        | 13M                            |
| Benzaldehyde          | 9.8M                           |
| IBMP                  | 5.8M                           |
| R-carvone             | 6.25M                          |
| S-carvone             | 6.13M                          |
| Citronellal           | 5.3M                           |
| Geraniol              | 5.58M                          |
| Acetophenone          | 8.3M                           |
| Eugenol               | 6.1M                           |
| Menthone              | 5.6M                           |
| Fenchone              | 6.17M                          |
| <b>Powdered odors</b> | <b>Stock concentration</b>     |
| Decanoic acid         | 172.26 g/mol                   |
| Homovanillic acid     | 182 g/mol                      |

**Supplementary Table S2. List of odors.** Complete list of odors used in this study. Odor formulation and concentration of stock solution are indicated.
