# Supplementary material for: Mesencephalic dopaminergic neurons express a repertoire of olfactory receptors and respond to odorant-like molecules
Source: PubMed Central journal article supplement (PMC4161876; doi:10.1186/1471-2164-15-729), 2014-08-27
Supplement: 12864_2013_6425_MOESM7_ESM.pdf [file 12864_2013_6425_MOESM7_ESM.pdf]

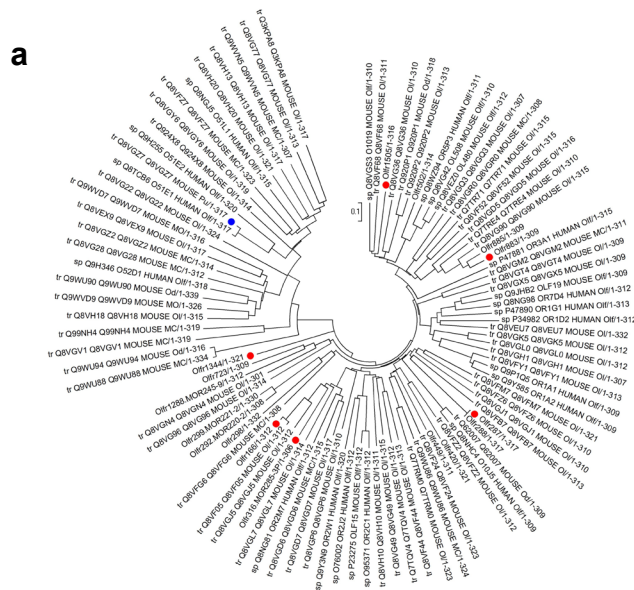

**b**

| RECEPTOR  | % SEQ. IDENTITY | CLOSEST HOMOLOGOUS | PUTATIVE LIGAND                        |
|-----------|-----------------|--------------------|----------------------------------------|
| MOR18-1   | Olf558          | 100                | Q8VGZ7 MOR18-1 Olf558 Nonanoic acid    |
| MOR270-1  | Olf166          | 95                 | Q8VF05 MOR271-1 Olf168 (+)-Fenchone    |
| MOR162-6  | Olf883          | 79                 | Q8VG90 MOR162-1 Olf983 4-Chromanone    |
| MOR285-3P | Olf316          | 54                 | Q8VF05 MOR271-1 Olf168 (+)-Fenchone    |
|           |                 | 52                 | Q920P2 MOR174-9 Olf73 (+)-Fenchone     |
| MOR211-4P | Olf1505         | 51                 | Q8VGS3 MOR180-1 Olf1019 Prenyl acetate |
|           |                 | 49                 | Q8VF68 MOR205-1 Olf221 Dihydrojasmane  |
| MOR124-1  | Olf1344         | 46                 | Q8VG49 MOR260-1 Olf715 Decanoic acid   |
| MOR286-1  | Olf287          | 45                 | Q8VF44 MOR259-1 Olf1519 2-Coumaranone  |

**Supplementary Figure S5. Evolutionary and cheminformatics characterization of mDA-ORs. a)** Model of phylogenetic tree distribution of mDA-ORs. **b)** Putative ligands for each receptor based on ligands of the closest homologue in the phylogenetic tree and by a cheminformatic search.
