# Supplementary material for: Mesencephalic dopaminergic neurons express a repertoire of olfactory receptors and respond to odorant-like molecules
Source: PubMed Central journal article supplement (PMC4161876; doi:10.1186/1471-2164-15-729), 2014-08-27
Supplement: 12864_2013_6425_MOESM8_ESM.pdf [file 12864_2013_6425_MOESM8_ESM.pdf]

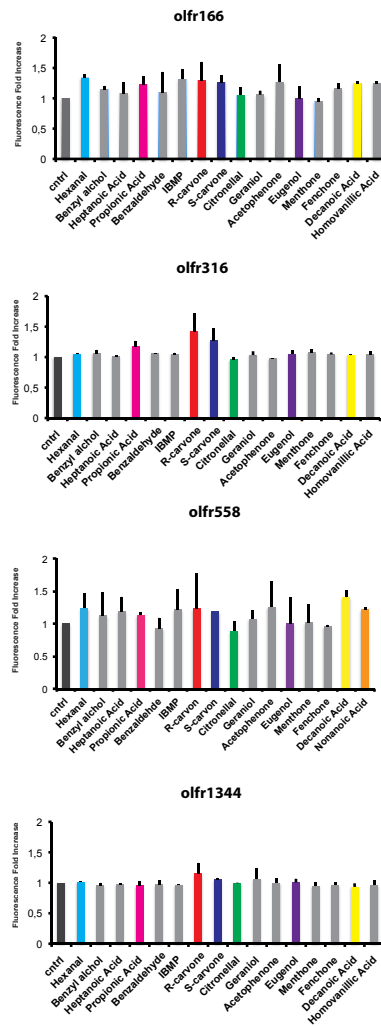

**Supplementary Figure S6. Analysis of mDA-ORs responses to selected odors.** mDA-ORs were transiently transfected in HEK cells in combination with pCRE-SEAP. After transfection, cells were pulsed with odor molecules at 600  $\mu$ M concentration. Nonanoic acid was used at 1mM. Ringer’s solution or DMSO was used as control. mDA-OR activation was measured with fluorimetric assay on culture medium. mDA-ORs used in this assays (*olfr166*, *olfr316*, *olfr558* and *olfr1344*) are indicated. Data indicate mean  $\pm$  st dev and are calculated on four independent experiments.
