# Supplementary material for: Mesencephalic dopaminergic neurons express a repertoire of olfactory receptors and respond to odorant-like molecules
Source: PubMed Central journal article supplement (PMC4161876; doi:10.1186/1471-2164-15-729), 2014-08-27
Supplement: 12864_2013_6425_MOESM9_ESM.pdf [file 12864_2013_6425_MOESM9_ESM.pdf]

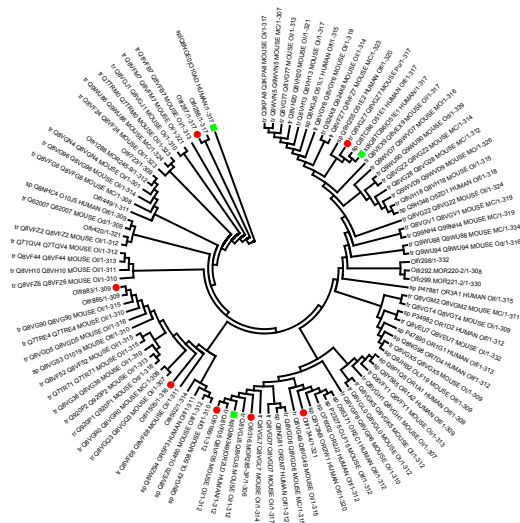

**Supplementary Figure S7. Sequence homology strategy for human mDA-ORs.** Model of phylogenetic tree distribution of mouse mDA-ORs for the identification of human homologues.
