# Supplementary material for: Mesencephalic dopaminergic neurons express a repertoire of olfactory receptors and respond to odorant-like molecules
Source: PubMed Central journal article supplement (PMC4161876; doi:10.1186/1471-2164-15-729), 2014-08-27
Supplement: 12864_2013_6425_MOESM10_ESM.pdf [file 12864_2013_6425_MOESM10_ESM.pdf]

Brain tissues and primary cells

| Experiment                                                       | OR7A5 | ORS1E1 | ORS1E2 | OR8G5 | OR2HP4 | ORS2K2 | OR9A2 | OR9A4 | ORS6B3P | OR10AB1P | OR4K6P | OR10J7P | OR4C15 | OR2L13 | OR10AD1 | OR2AK2 |
|------------------------------------------------------------------|-------|--------|--------|-------|--------|--------|-------|-------|---------|----------|--------|---------|--------|--------|---------|--------|
| amygdala - adult, donor10196 : CNHs13793 ctss [tpm]              | 0     | 0.81   | 2.42   | 0     | 0      | 0      | 0     | 0     | 0       | 0        | 0      | 0       | 0      | 20.93  | 0       | 0      |
| amygdala, adult, donor10252 : CNHs12311 ctss [tpm]               | 0     | 0.22   | 0.22   | 0.11  | 0      | 0      | 0     | 0     | 0.11    | 0        | 0      | 0       | 0      | 27.24  | 0       | 0.11   |
| brain, adult, donor1 : CNHs11796 ctss [tpm]                      | 0     | 0.8    | 0.8    | 0     | 0      | 0      | 0     | 0     | 0       | 0        | 0      | 0       | 0      | 27.95  | 0       | 0      |
| brain, adult, pool1 : CNHs10617 ctss [tpm]                       | 0     | 0.09   | 0.53   | 0     | 0      | 0      | 0     | 0     | 0       | 0        | 0      | 0       | 0      | 22.86  | 0       | 0      |
| brain, fetal, pool1 : CNHs10797 ctss [tpm]                       | 0     | 1.34   | 1.84   | 0     | 0      | 0      | 0     | 0     | 0       | 0        | 0      | 0       | 0      | 5.52   | 0       | 0      |
| caudate nucleus - adult, donor10196 : CNHs13802 ctss [tpm]       | 0     | 0      | 0.72   | 0     | 0      | 0      | 0     | 0     | 0       | 0        | 0      | 0       | 0      | 18.1   | 0       | 0      |
| caudate nucleus, adult, donor10252 : CNHs12321 ctss [tpm]        | 0     | 0.2    | 0      | 0     | 0      | 0      | 0.1   | 0     | 0       | 0        | 0      | 0       | 0      | 19.06  | 0       | 0.1    |
| caudate nucleus, adult, donor10258 : CNHs14232 ctss [tpm]        | 0     | 0      | 0      | 0     | 0      | 0      | 0.48  | 0     | 0       | 0.48     | 0      | 0       | 0      | 23.96  | 0       | 0      |
| cerebellum - adult, donor10196 : CNHs13799 ctss [tpm]            | 0     | 0.17   | 0      | 1.29  | 0      | 0      | 0     | 0     | 0       | 0        | 0      | 0       | 0      | 18.09  | 0       | 0      |
| cerebellum, adult, donor10252 : CNHs12323 ctss [tpm]             | 0.17  | 0.17   | 0.25   | 0.08  | 0      | 0      | 0     | 0     | 0       | 0        | 0.08   | 0       | 0      | 9.22   | 0       | 0      |
| cerebellum, adult, pool1 : CNHs11795 ctss [tpm]                  | 0     | 0.21   | 0.25   | 0     | 0      | 0      | 0     | 0.25  | 0       | 0        | 0      | 0       | 0      | 16.66  | 0.25    | 0      |
| cerebral meninges, adult : CNHs12840 ctss [tpm]                  | 0.21  | 0.64   | 1.07   | 0     | 0      | 0      | 0     | 0     | 0       | 0        | 0      | 0       | 0      | 16.06  | 0       | 0      |
| cerebrospinal fluid, donor2 : CNHs13437 ctss [tpm]               | 0     | 0.71   | 0.36   | 0.71  | 0      | 0      | 0     | 0     | 0       | 0.36     | 0.71   | 0.36    | 0      | 13.88  | 0       | 0.36   |
| corpus callosum, adult, pool1 : CNHs10649 ctss [tpm]             | 0     | 0.27   | 0.2    | 0     | 0      | 0      | 0.27  | 0     | 0       | 0        | 0      | 0       | 0      | 15.9   | 0       | 0.14   |
| diencephalon, adult : CNHs12610 ctss [tpm]                       | 0.46  | 0.23   | 0.46   | 0     | 0      | 0.23   | 0.23  | 0     | 0       | 0        | 0      | 0       | 0      | 27.63  | 0       | 0      |
| frontal lobe, adult, pool1 : CNHs10647 ctss [tpm]                | 0     | 0.32   | 0.32   | 0     | 0      | 0      | 0     | 0     | 0       | 0        | 0.06   | 0       | 0      | 20.68  | 0.06    | 0.06   |
| globus pallidus - adult, donor10196 : CNHs13801 ctss [tpm]       | 0     | 0.99   | 0      | 0     | 0      | 0      | 0.99  | 0     | 0       | 0        | 0      | 0       | 0      | 17.88  | 0       | 0.5    |
| globus pallidus, adult, donor10252 : CNHs12319 ctss [tpm]        | 0.55  | 0.44   | 0.11   | 0.11  | 0      | 0.11   | 0.22  | 0.11  | 0       | 0        | 0      | 0       | 0.11   | 26.64  | 0.11    | 0.22   |
| globus pallidus, adult, donor10258 : CNHs14549 ctss [tpm]        | 0.37  | 5.02   | 5.51   | 0.98  | 0.24   | 0.11   | 0.61  | 0.73  | 0.73    | 0.24     | 0.73   | 0       | 0.37   | 43.71  | 0.24    | 0.49   |
| hippocampus - adult, donor10196 : CNHs13795 ctss [tpm]           | 0     | 0      | 0      | 0     | 0      | 0      | 0     | 0     | 0       | 0        | 0      | 0       | 0      | 24.16  | 0       | 1.21   |
| hippocampus, adult, donor10252 : CNHs12312 ctss [tpm]            | 0.19  | 0.1    | 0.1    | 0     | 0.1    | 0.1    | 0     | 0     | 0       | 0        | 0      | 0       | 0      | 23.72  | 0       | 0.19   |
| hippocampus, adult, donor10258 : CNHs14227 ctss [tpm]            | 0     | 0.39   | 0      | 0     | 0      | 0      | 0.39  | 0     | 0       | 0        | 0      | 0       | 0      | 31.27  | 0       | 0.39   |
| hippocampus, newborn, donor10223 : CNHs14081 ctss [tpm]          | 0     | 0.3    | 0.6    | 0     | 0      | 0      | 0.3   | 0     | 0       | 0        | 0.9    | 0.3     | 0      | 16.77  | 0       | 0      |
| insula, adult, pool1 : CNHs10646 ctss [tpm]                      | 0     | 0.31   | 0.56   | 0     | 0      | 0      | 0.12  | 0     | 0       | 0        | 0      | 0       | 0      | 23.29  | 0       | 0.37   |
| locus coeruleus - adult, donor10196 : CNHs13808 ctss [tpm]       | 0.49  | 0.29   | 0.2    | 0     | 0      | 0.1    | 0.2   | 0     | 0       | 0.1      | 0.29   | 0       | 0      | 39.81  | 0.1     | 0.2    |
| locus coeruleus, adult, donor10252 : CNHs12322 ctss [tpm]        | 0.22  | 0.32   | 0.86   | 0     | 0.65   | 0      | 0.11  | 0.11  | 0       | 0        | 0      | 0       | 0      | 30.54  | 0       | 0.11   |
| locus coeruleus, adult, donor10258 : CNHs14550 ctss [tpm]        | 0     | 0.37   | 1.12   | 0     | 0.19   | 0      | 0     | 0     | 0       | 0        | 0      | 0       | 0      | 51.86  | 0.19    | 0.74   |
| medial frontal gyrus - adult, donor10196 : CNHs13796 ctss [tpm]  | 0     | 0.71   | 0      | 0     | 0      | 0      | 0     | 0     | 0       | 0        | 0      | 0       | 0      | 36.4   | 0       | 0      |
| medial frontal gyrus, adult, donor10252 : CNHs12310 ctss [tpm]   | 0.29  | 0.29   | 0.67   | 0.19  | 0      | 0      | 0.29  | 0     | 0       | 0.1      | 0      | 0       | 0      | 39.71  | 0       | 0.48   |
| medial temporal gyrus - adult, donor10196 : CNHs13809 ctss [tpm] | 0.09  | 0.09   | 0.26   | 0     | 0      | 0      | 0.19  | 0     | 0       | 0.09     | 0      | 0       | 0      | 46.07  | 0       | 0.43   |
| medial temporal gyrus, adult, donor10252 : CNHs12316 ctss [tpm]  | 0.47  | 0.38   | 0.57   | 0     | 0      | 0.19   | 0.57  | 0     | 0       | 0.19     | 0.09   | 0       | 0      | 40.7   | 0       | 0.38   |
| medulla oblongata - adult, donor10196 : CNHs13800 ctss [tpm]     | 0.42  | 0.84   | 0.84   | 0.42  | 0.42   | 0      | 0     | 0     | 0       | 0        | 0      | 0       | 0      | 20.65  | 0       | 0.42   |
| medulla oblongata, adult, donor10252 : CNHs12315 ctss [tpm]      | 0.29  | 0.77   | 0.48   | 0.1   | 0.19   | 0      | 0.19  | 0     | 0       | 0        | 0      | 0       | 0.1    | 16.21  | 0       | 0      |
| medulla oblongata, adult, pool1 : CNHs10645 ctss [tpm]           | 0     | 0.72   | 1.11   | 0     | 0      | 0      | 0.07  | 0     | 0       | 0        | 0      | 0       | 0      | 21.12  | 0       | 0      |
| Neural stem cells, donor1 : CNHs11063 ctss [tpm]                 | 0.42  | 3.18   | 4.01   | 0.55  | 0      | 0      | 0.14  | 0     | 0.42    | 0.14     | 0.28   | 0.28    | 0.42   | 21.03  | 0.28    | 0      |
| Neural stem cells, donor2 : CNHs11384 ctss [tpm]                 | 0.27  | 4.01   | 5.87   | 1.34  | 0      | 0      | 0.53  | 0.27  | 0       | 0.27     | 0.53   | 0.53    | 0.77   | 29.37  | 0       | 0      |
| Neurons, donor1 : CNHs12338 ctss [tpm]                           | 0.5   | 4.79   | 8.32   | 1.01  | 0.25   | 0      | 0.5   | 0     | 0.25    | 0.76     | 0.25   | 0.5     | 1.06   | 23.45  | 0.76    | 0.5    |
| Neurons, donor2 : CNHs12726 ctss [tpm]                           | 0.51  | 1.88   | 0.51   | 0.51  | 0      | 0.17   | 0.88  | 0.17  | 0.17    | 0.17     | 0.17   | 0.17    | 0.68   | 15.24  | 0.17    | 0.17   |
| Neurons, donor3 : CNHs13815 ctss [tpm]                           | 0.64  | 4.66   | 4.66   | 1.91  | 0      | 0.21   | 0.21  | 0     | 1.06    | 0.42     | 0.21   | 1.06    | 30.09  | 0      | 0       | 0      |
| nucleus accumbens, adult, pool1 : CNHs10644 ctss [tpm]           | 0.14  | 0.27   | 0.47   | 0     | 0      | 0      | 0.07  | 0     | 0       | 0        | 0      | 0       | 0      | 22.58  | 0       | 0.14   |
| occipital cortex - adult, donor10196 : CNHs13798 ctss [tpm]      | 0     | 0      | 0      | 0     | 0      | 0      | 0     | 0     | 0       | 0        | 0      | 0       | 0      | 42.5   | 0       | 1.18   |
| occipital cortex, adult, donor10252 : CNHs12320 ctss [tpm]       | 0.1   | 0.2    | 1.27   | 0.29  | 0      | 0      | 0     | 0     | 0       | 0.1      | 0.1    | 0       | 0.1    | 59.47  | 0       | 0.68   |
| occipital lobe, adult, donor1 : CNHs11787 ctss [tpm]             | 0.49  | 0.16   | 1.46   | 0     | 0      | 0      | 0     | 0     | 0       | 0.16     | 0      | 0       | 0      | 44.13  | 0       | 0.16   |
| occipital lobe, fetal, donor1 : CNHs11784 ctss [tpm]             | 0     | 0      | 0      | 0     | 0      | 0      | 0     | 0     | 0       | 0        | 0      | 0       | 0      | 8.6    | 0       | 0      |
| occipital pole, adult, pool1 : CNHs10643 ctss [tpm]              | 0.07  | 0.52   | 0.45   | 0     | 0      | 0      | 0     | 0     | 0       | 0        | 0      | 0       | 0      | 21.53  | 0       | 0      |
| olfactory region, adult : CNHs12611 ctss [tpm]                   | 0     | 0.13   | 0.26   | 0     | 0      | 0      | 0     | 0     | 0       | 0.13     | 0.13   | 0       | 0      | 44.89  | 0       | 0.26   |
| Oligodendrocyte - precursors, donor1 : CNHs12586 ctss [tpm]      | 0     | 1.26   | 1.26   | 0.63  | 0      | 0      | 0     | 0     | 0       | 0        | 0      | 0       | 0      | 5.65   | 0       | 0      |
| optic nerve, donor1 : CNHs13449 ctss [tpm]                       | 0.7   | 1.75   | 3.86   | 1.4   | 0      | 0      | 0.7   | 0.7   | 0.35    | 0        | 0.35   | 0.7     | 0.35   | 24.9   | 0.35    | 0      |
| paracentral gyrus, adult, pool1 : CNHs10642 ctss [tpm]           | 0     | 0.14   | 0.92   | 0     | 0      | 0.14   | 0.07  | 0     | 0       | 0        | 0      | 0       | 0      | 26.73  | 0       | 0.14   |
| parietal cortex, adult, donor10258 : CNHs14226 ctss [tpm]        | 0     | 0.55   | 0      | 0     | 0      | 0      | 0     | 0     | 0       | 0        | 0      | 0       | 0      | 21.61  | 0       | 0      |
| parietal lobe - adult, donor10196 : CNHs13797 ctss [tpm]         | 0     | 0      | 0      | 0     | 0      | 0      | 0     | 0     | 0.63    | 0        | 0      | 0       | 0      | 23.79  | 0       | 0      |
| parietal lobe, adult, donor10252 : CNHs12317 ctss [tpm]          | 0.14  | 0.29   | 1.29   | 0     | 0      | 0      | 0     | 0     | 0.14    | 0.29     | 0      | 0       | 0      | 42.96  | 0       | 0.57   |
| parietal lobe, adult, pool1 : CNHs10641 ctss [tpm]               | 0.14  | 0.27   | 1.02   | 0     | 0      | 0      | 0.07  | 0     | 0       | 0        | 0      | 0       | 0      | 33.1   | 0       | 0.27   |
| parietal lobe, fetal, donor1 : CNHs11782 ctss [tpm]              | 0     | 0      | 0      | 0     | 0      | 0      | 0     | 0     | 0       | 0        | 0      | 0       | 0      | 10.34  | 0.32    | 0      |
| pons, adult, pool1 : CNHs10640 ctss [tpm]                        | 0.07  | 0.34   | 0.07   | 0     | 0      | 0      | 0     | 0     | 0.14    | 0        | 0      | 0       | 0      | 33.46  | 0       | 0.34   |
| postcentral gyrus, adult, pool1 : CNHs10638 ctss [tpm]           | 0     | 0.07   | 0.97   | 0     | 0      | 0      | 0.07  | 0     | 0       | 0.07     | 0      | 0       | 0      | 26.47  | 0       | 0.28   |
| putamen, adult, donor10196 : CNHs12324 ctss [tpm]                | 0.13  | 0.39   | 0.78   | 0     | 0      | 0      | 0.13  | 0.13  | 0       | 0.13     | 0      | 0       | 0.13   | 23.39  | 0       | 0.13   |
| putamen, adult, donor10252 : CNHs12318 ctss [tpm]                | 0     | 0.89   | 0.89   | 2.66  | 0      | 0      | 0     | 0     | 0       | 0        | 0      | 0       | 0.13   | 17.66  | 0       | 0      |
| putamen, adult, donor10258, tech_rep1 : CNHs14225 ctss [tpm]     | 0     | 0.89   | 0.89   | 2.66  | 0      | 0      | 0     | 0     | 0       | 0        | 0      | 0       | 0      | 17.75  | 0       | 0.89   |
| putamen, adult, donor10258, tech_rep2 : CNHs14228 ctss [tpm]     | 0.18  | 0.18   | 0.18   | 0     | 0      | 0      | 0     | 0     | 0       | 0        | 0      | 0       | 0      | 28.59  | 0       | 0      |
| retina, adult, pool1 : CNHs10636 ctss [tpm]                      | 0.16  | 1.97   | 27.6   | 0     | 0      | 0      | 0.08  | 0.08  | 0       | 0        | 0      | 0       | 0      | 6.06   | 0       | 0      |
| Schwann Cells, donor1 : CNHs12073 ctss [tpm]                     | 0     | 0      | 0      | 0     | 0      | 0      | 0     | 0     | 0       | 0        | 0      | 0       | 0      | 8.52   | 0       | 0      |
| Schwann Cells, donor2 : CNHs12345 ctss [tpm]                     | 4.31  | 0      | 4.31   | 0     | 0      | 0      | 0     | 0     | 0       | 0        | 0      | 0       | 0      | 8.61   | 0       | 0      |
| Schwann Cells, donor3 : CNHs12021 ctss [tpm]                     | 0     | 0      | 0      | 0     | 0      | 0      | 0     | 0     | 0       | 0        | 0      | 0.62    | 0      | 9.21   | 0       | 0      |
| spinal cord - adult, donor10196 : CNHs13807 ctss [tpm]           | 0.14  | 0.56   | 0.14   | 0     | 0      | 0      | 0.28  | 0     | 0       | 0.14     | 0.28   | 0.14    | 0      | 29.96  | 0       | 0      |
| spinal cord, adult, donor10252 : CNHs12227 ctss [tpm]            | 0.49  | 0.73   | 1.22   | 0     | 0.24   | 0.49   | 0.49  | 0     | 0       | 0        | 0      | 0       | 0      | 18.32  | 0       | 0      |
| spinal cord, adult, donor10258 : CNHs14222 ctss [tpm]            | 0     | 0      | 0.44   | 0     | 0      | 0      | 0     | 0     | 0       | 0.44     | 0      | 0       | 0      | 24.01  | 0       | 0.44   |
| spinal cord, fetal, donor1 : CNHs11764 ctss [tpm]                | 0     | 0.35   | 1.41   | 0     | 0      | 0      | 0     | 0     | 0       | 0        | 0      | 0       | 0      | 11.29  | 0       | 0      |
| substantia nigra - adult, donor10196 : CNHs13803 ctss [tpm]      | 4.43  | 0      | 1.48   | 1.48  | 0      | 0      | 2.96  | 0     | 0.12    | 0        | 0      | 0       | 0      | 31.03  | 0       | 0      |
| substantia nigra, adult, donor10252 : CNHs12318 ctss [tpm]       | 1.22  | 0.24   | 0.24   | 0     | 0      | 0.24   | 0.24  | 0.12  | 0.12    | 0        | 0.12   | 0       | 0      | 28.46  | 0       | 0.24   |
| substantia nigra, adult, donor10258 : CNHs14224 ctss [tpm]       | 0.42  | 0.42   | 0.42   | 0     | 0.42   | 0.42   | 0.42  | 0.42  | 0.42    | 0.42     | 0.42   | 0.42    | 0      | 25.16  | 0       | 0      |
| substantia nigra, newborn, donor10223 : CNHs14076 ctss [tpm]     | 0     | 0.57   | 1.7    | 0     | 0      | 0      | 0     | 0     | 0       | 0        | 0      | 0       | 0      | 11.35  | 0       | 0      |
| temporal lobe, adult, pool1 : CNHs10637 ctss [tpm]               | 0     | 0.21   | 0.48   | 0     | 0      | 0      | 0     | 0     | 0       | 0        | 0      | 0       | 0      | 12.87  | 0       | 0.07   |
| temporal lobe, fetal, donor1, tech_rep1 : CNHs11772 ctss [tpm]   | 0     | 0.32   | 0      | 0     | 0      | 0      | 0     | 0     | 0       | 0        | 0      | 0       | 0      | 15.51  | 0       | 0      |
| temporal lobe, fetal, donor1, tech_rep2 : CNHs12996 ctss [tpm]   | 0     | 0      | 0      | 0     | 0      | 0      | 0.25  | 0     | 0       | 0        | 0      | 0       | 0      | 13.57  | 0       | 0      |
| thalamus - adult, donor10196 : CNHs13794 ctss [tpm]              | 0.63  | 0      | 0      | 0     | 0      | 0      | 0     | 0.63  | 0       | 0.63     | 0      | 0       | 0      | 26.64  | 0       | 0.63   |
| thalamus, adult, donor10252 : CNHs12314 ctss [tpm]               | 0.34  | 0.26   | 0.17   | 0.09  | 0.17   | 0      | 0     | 0     | 0       | 0.63     | 0      | 0       | 0.09   | 24.23  | 0       | 0.09   |
| thalamus, adult, donor10258, tech_rep1 : CNHs14223 ctss [tpm]    | 0     | 0      | 0      | 0     | 0      | 0      | 0     | 0     | 0       | 0        | 0      | 0       | 0      | 23.94  | 0       | 0.96   |
| thalamus, adult, donor10258, tech_rep2 : CNHs14551 ctss [tpm]    | 0.11  | 0.89   | 0.56   | 0.22  | 0.45   | 0      | 0.67  | 0.11  | 0       | 0        | 0      | 0       | 0.11   | 37.17  | 0       | 0.22   |

Non-brain Tissues

| Experiment                                       | OR7A5 | ORS1E1 | ORS1E2 | OR8G5 | OR2HP4 | ORS2K2 | OR9A2 | OR9A4 | ORS6B3P | OR10AB1P | OR4K6P | OR10J7P | OR4C15 | OR2L13 | OR10AD1 | OR2AK2 |
|--------------------------------------------------|-------|--------|--------|-------|--------|--------|-------|-------|---------|----------|--------|---------|--------|--------|---------|--------|
| achilles tendon, donor2 : CNHs13435 ctss [tpm]</ |       |        |        |       |        |        |       |       |         |          |        |         |        |        |         |        |
