# Supplementary material for: Mesencephalic dopaminergic neurons express a repertoire of olfactory receptors and respond to odorant-like molecules
Source: PubMed Central journal article supplement (PMC4161876; doi:10.1186/1471-2164-15-729), 2014-08-27
Supplement: 12864_2013_6425_MOESM11_ESM.pdf [file 12864_2013_6425_MOESM11_ESM.pdf]

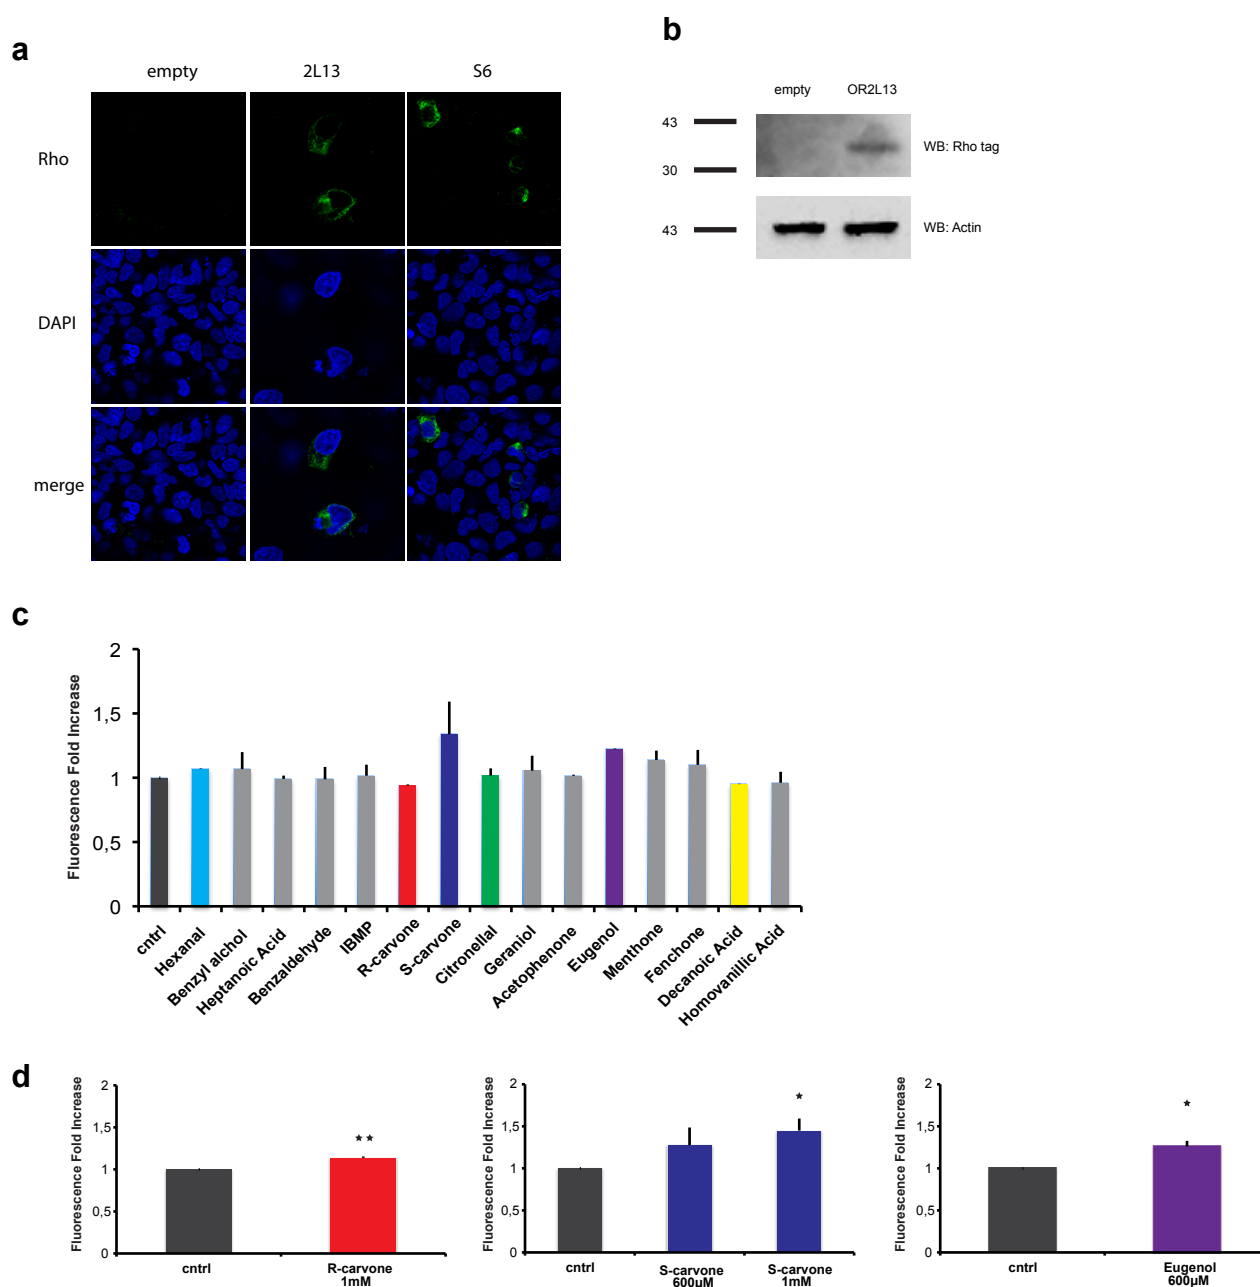

**Supplementary Figure S9. Analysis of OR2L13 response to selected odors.** Expression of human OR2L13 in HEK cells was verified by immunofluorescence (a) and western blotting (b) with anti-Rho antibody. pCDN3.1- empty vector and S6 OR expressing plasmid were used as negative and positive controls, respectively. For functional assays, OR2L13 was transiently transfected in HEK cells in combination with pCRE-SEAP. After transfection, cells were challenged with odor molecules at 600µM concentration (c) or at the indicated quantities (d). Ringer's solution or DMSO was used as control. mDA-OR activation was measured with fluorometric assay on culture medium. Data indicate mean  $\pm$  st dev and are calculated on two independent experiments.
