# Supplementary material for: Mesencephalic dopaminergic neurons express a repertoire of olfactory receptors and respond to odorant-like molecules
Source: PubMed Central journal article supplement (PMC4161876; doi:10.1186/1471-2164-15-729), 2014-08-27
Supplement: 12864_2013_6425_MOESM12_ESM.pdf [file 12864_2013_6425_MOESM12_ESM.pdf]

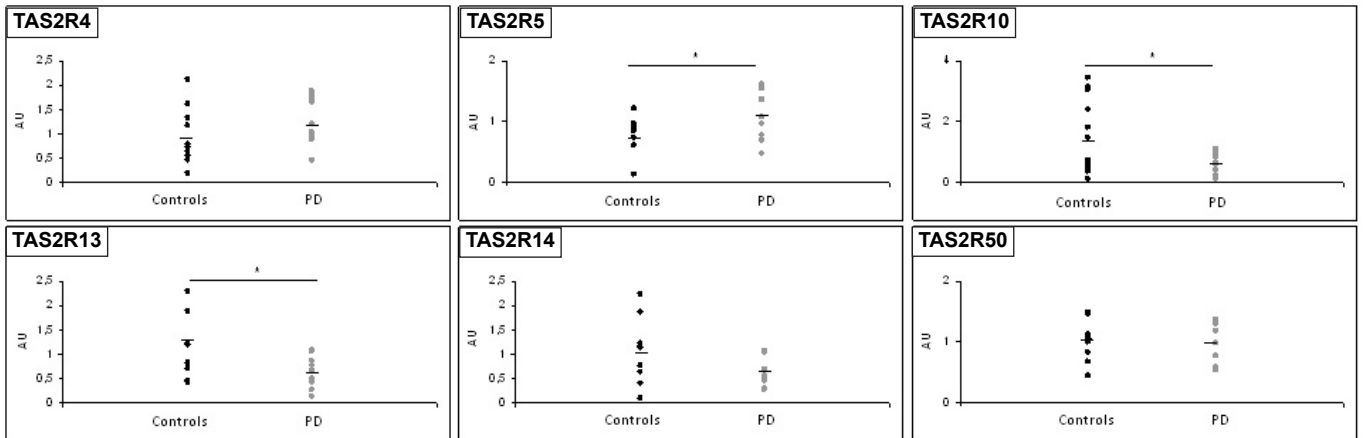

**Supplementary Figure S10. A subset of human Taste Receptors is regulated in PD.** qRT-PCR of SN from control and PD post-mortem brain samples. Data indicate mean  $\pm$  stdev. \*  $p < 0.05$ .
