# Supplementary material for: Mesencephalic dopaminergic neurons express a repertoire of olfactory receptors and respond to odorant-like molecules
Source: PubMed Central journal article supplement (PMC4161876; doi:10.1186/1471-2164-15-729), 2014-08-27
Supplement: 12864_2013_6425_MOESM13_ESM.pdf [file 12864_2013_6425_MOESM13_ESM.pdf]

## Oligonucleotides for Non-quantitative PCR

### **Olfr78**

fw: CTCAC TTTTGG TTTGGCTTC  
rev: AGCAGAATGGCAGTTAGACC

### **Olfr118**

fw: TGTCATACCGAAGATGTTGC  
rev: GTAGATGGGAGGAACAGGTG

### **Olfr1129**

fw: CCACTGAGTGTTTTCTGCTG  
rev: TGGGAGTCACAATGGTGTAA

### **Olfr130**

fw: CAACTTGAGAAGATCCTCTTT  
rev: CTGGATATAGATAGCAGTGAT

### **Olfr234**

fw: TTCTTCCTCTGCCATTTCTC  
rev: GAGAGTGCCGTAGAATACCG

### **Olfr287**

fw: GGTCTTTCTAGTGGGTGTGG  
rev: GGGGGTGATAATGGTGTAGA

### **Olfr299**

fw: CTCAGGAATCTGTCTATTGTA  
rev: AGATGATAGGATTTAAGAATG

### **Olfr316**

fw: ATCATGGACATGATGTACATC  
rev: ATCTGGATTACAACAACCAAC

### **Olfr420**

fw: TCCCAAAGATGCTCTCTAGC  
rev: AGGTAGCAGAGAAGCGAAGA

### **Olfr449**

fw: CTTGCCAACCTGTCTTTCTT  
rev: AAAAGGCTTTCTGCTTTCTT

### **Olfr502**

fw: TGACATAGGCTATTCATCTTC  
rev: GGA CT TGGGCATCACATAAA

### **Olfr723**

fw: ACATGTGTCTTTCCACTGTC  
rev: GACCACAATTATGTGAGCAGA

### **Olfr883**

fw: CTGCACAACCCCATGTA CTA  
rev: AGGATGTTGGAAAGGATCAA

### **Olfr885**

fw: AATTTATCTTGCTGGGCTTG  
rev: GGAGGTACTTGAGCAGGAGA

### **Olfr909**

fw: TGGCCTATGATCGTTATGTG  
rev: GGGCAATTTTAACATCCTTG

### **Olfr958**

fw: CTGTGTCTCCCAGCTCTTCT  
rev: GCATTGGACCTACCAAGTTC

### **Olfr1288**

fw: AAGTCATTTCTTTCCACAGCT  
rev: TGATGGCCAACCTCATATCTT

### **Olfr1344**

fw: GATAGCCTTGGACAGACGAC  
rev: CCAGGTGTAAGAGGCTAGGA

### **Olfr1443**

fw: ACTGCAGACCCCACTCTTTA

rev: GGAGTGCAGAACAGATGACA

**Olfr166**

fw: CAAACAGGCCTGCTACTTTT

rev: CTTGTGCTCACAAACACCAT

**Olfr1505**

fw: ACGCTGGCTACAGGTAAAAC

rev: CAGGGATTTCTTTGAACCAC

**Olfr1333**

fw: TGGGTCTCTGAGTTCATCCT

rev: CAAGACCAAGTCCACCATCT

**Olfr558**

fw: TTCCCTTTGTGTTCCCTCTA

rev: GGCTGAGATGATGACAATGA

**Olfr441**

fw: TCAGACATGGATCACAGAGG

rev: ACAAGCTGCAAAGATGACAA

## Oligonucleotides for quantitative RT-PCR

**Olfr287**

fw: AGTTCACCATGAAGTTGATCTTTGTG

rev: ATGTAAGAAAACATGGCTGAGGTGTAG

**Olfr316**

fw: GTGTGATCCAAGCCTTTGTTTTTCT

rev: CTAGAGCCACAGAATGGAAGTTGAA

**Olfr558**

fw: CTACCATCCAGTTTGTGCTTGTCT

rev: GAAGACAGGTAAGGGTGCCATTAGT

**$\beta$ -actin**

fw: CACACCCGCCACCAAGTTC

rev: CCCATTCCCACCATCACACC

## Oligonucleotides for cloning

**FL\_olfr166**

fw: ATGGAGAAATGGAATCAGAGCTCAAGTG

rev: TTACGGTTTAGTTGAAGGAAAAGTACCAAGGAC

**FL+linker\_olfr166**

fw: ACTAGCGGCCGCCATGGAGAAATGGAATCAGAGCTCAAGTG

rev: ACTAGAATTCTTACGGTTTAGTTGAAGGAAAAGTACCAAGGAC

**FL\_olfr287**

fw: ATGAGGTCCCAGACAGCAGAC

rev: CTAGACAGACTCTGCCTGAGCCA

**FL+linker\_olfr287**

fw: ACTAGCGGCCGCCATGAGGTCCCAGACAGCAGAC

rev: ACTAGCGGCCGCCATGAGGTCCCAGACAGCAGAC

**FL\_olfr316**

fw: ATGGAGTCAGGAAACCGCAGC

rev: TCATTTCAATTTGTCTCCTCAGGGCCC

**FL+linker\_olfr316**

fw: ACTAGCGGCCGCCATGGAGTCAGGAAACCGCAGC

rev: ACTAGAATTCTCATTTCATTTGTCTCCTCAGGGCCC

**FL\_olfr558**

fw: ATGGTGGGCTTCAATAGCAATGAATCC

rev: CTAGTGATCTGAAGTGTGTGTGGTCACG

**FL+linker\_olfr558**

fw: ACTAGCGGCCGCCATGGTGGGCTTCAATAGCAATGAATCC

rev: ACTAGAATTCTAGTGATCTGAAGTGTGTGGTCACG

**FL\_olfr883**

fw: ATGGTATTAGAAAATTCCTCTTCAGTG

rev: TTAGGTAAAACCTCTTTTCATCAAAGT

**FL+linker\_olfr883**

fw: ACTAGCGGCCGCCATGGTATTAGAAAA

rev: ACTAGAATTCTTAGGTAAAACCTCTTTTCATCAAAGT

**FL\_olfr1344**

fw: ATGGGCCCGGGAACCCTCAAT

rev: TTAGTGCAACACAATGCGCGTCCC

**FL+linker\_olfr1344**

fw: ACTAGCGGCCGCCATGGGCCCGGGAACCCTCAAT

rev: ACTAGAATTCTTAGTGCAACACAATGCGCGTCCC

**Oligonucleotides for ISH probe preparation****Olfr287**

fw: GGTCTTTCTAGTGGGTGTGG

rev: GGGGGTGATAATGGTGTAGA

**Olfr316**

fw: ATCATGGACATGATGTACATC

rev: ATCTGGATTACAACAACCAAC

**Olfr558**

fw: CCAGGATTGGAAGAGGTTCA

rev: CTCCATGCCAGACAAGGAAT

**Supplementary Table 3. List of primers.** Complete list of oligonucleotides used in this study for non-quantitative PCR, quantitative RT-PCR, cloning and in situ hybridization.
